# Supplementary material for: CESTA, a positive regulator of brassinosteroid biosynthesis
Source: PubMed Central journal article supplement — EMBO J. 2011 Feb 18;30(6):1149–61. doi: 10.1038/emboj.2011.35 (PMC3061039; doi:10.1038/emboj.2011.35), 2011-02-18
Supplement: emboj201135s1.pdf [file emboj201135s1.pdf]

## Supplementary materials and methods

### *Plant material, growth conditions and histological analyses*

*Arabidopsis thaliana* ecotype Columbia-0 (Col-0) was the wild-type for the generation of all plant material described in this study. General plant handling and transformation protocols as well as  $\beta$ -glucuronidase (GUS) staining followed standard procedures (Weigel and Glazebrook, 2001). The *ces-1* line was identified in the SIGnAL database (SALK Institute) and corresponds to line SALK\_082100. This line segregated kanamycin resistance 3:1 and was defined by the absence of CES transcript.

For hypocotyl elongation assays mother plants were cultivated in a controlled environment of 16 hr/ 8 hr light/dark cycle ( $100 \mu\text{mol m}^{-2}\text{s}^{-1}$  white light) at a temperature of 21°C/ 17°C ( $\pm 1$ ). Seeds of all lines used in one experiment were harvested at the same time and plated on ATS medium (Lincoln *et al.*, 1990). Hypocotyl elongation assays were performed as described previously (Poppenberger *et al.*, 2005). For hypocotyl growth response assays 24-epiBL (OIChemIm Ltd, Olomouc, Czech Republic) and Brz2001 (Sekimata *et al.*, 2001) were dissolved in DMSO and added to ATS medium in the required concentrations. Seeds were incubated on vertical plates either in the dark (following a 4 hr light impulse) or in the light and hypocotyl elongation was measured at different time-points. For each experiment the 20 tallest seedlings originating from 40 seeds (to correct for late germination) were analyzed in 3 replicates and the standard error (SE) was calculated.

For quantitative PCR analysis 10-day-old seedlings were grown vertically on ATS plates and transferred to flasks containing liquid ATS medium and incubated for 48 hr on an orbital shaker at 20 rpm. 24-epiBL and Brz2001 were then added to the flasks in the indicated concentrations and after incubation seedlings were ground in liquid nitrogen.

### ***Western blotting***

For Western blot analysis 100 mg of plant material was ground to a fine powder and extracted with 300  $\mu$ l loading buffer (66 mM TRIS/HCl pH=6.8, 133 mM DTT, 2.7% SDS, 13% glycerol and 0.01% bromophenol blue). 20  $\mu$ l of this extract were separated by SDS-PAGE (10% gel) and blotted onto Immobilon P (Millipore Cooperation, Bedford, MA, USA). Membranes were probed with a rabbit anti-c-Myc antibody. Alkaline phosphatase-conjugated goat anti-rabbit IgG (Santa Cruz Biotechnology, CA) was used as secondary antibody and detected by enhanced chemiluminescence using CDP-Star reagent (Amersham Biosciences).

### ***Protein interaction assays and kinase assays***

For yeast two-hybrid assays, CES, BEE1 and BEE3 were PCR amplified from Col-0 cDNA using specific primers and cloned into GAL4 bait (pGADT7) and prey (pGBKT7) vectors, respectively (Clontech). The sequenced constructs were introduced into the yeast two-hybrid strain PJ69-4A (James *et al.*, 1996) and  $\beta$ -galactosidase activity was assayed.

Kinase assays were performed as described previously (Rozhon *et al.*, 2010).

### **Supplementary references**

Goda H, Sawa S, Asami T, Fujioka S, Shimada Y, Yoshida S (2004) Comprehensive comparison of auxin-regulated and brassinosteroid-regulated genes in Arabidopsis. *Plant Physiol* **134**: 1555–1573

Goda H, Shimada Y, Asami T, Fujioka S, Yoshida S (2002) Microarray analysis of brassinosteroid-regulated genes in Arabidopsis. *Plant Physiol* **130**: 1319–1334

He JX, Gendron JM, Sun Y, Gampala SS, Gendron N, Sun CQ, Wang ZY (2005) BZR1 is a transcriptional repressor with dual roles in brassinosteroid homeostasis and growth responses. *Science* **307**: 1634–1638

James P, Halladay J, Craig EA (1996) Genomic libraries and a host strain designed for highly efficient two-hybrid selection in yeast. *Genetics* **144**: 1425–1436

Li L, Ye H, Guo H, Yin Y (2010) Arabidopsis IWS1 interacts with transcription factor BES1 and is involved in plant steroid hormone brassinosteroid regulated gene expression. *Proc Nat Acad Sci USA* **107**: 3918–3923

Lincoln C, Britton JH, Estelle M (1990) Growth and development of the *axr1* mutants of *Arabidopsis*. *Plant Cell* **2**: 1071–1080

Müssig C, Fischer S, Altmann T (2002) Brassinosteroid-regulated gene expression. *Plant Physiol* **129**: 1241–1251

Poppenberger B, Fujioka S, Sueno K, George GL, Vaistij FE, Seto H, Hiranuma S, Takastuto S, Adam G, Yoshida S, Bowles D (2005) The UGT73C5 of *Arabidopsis thaliana* glucosylates brassinosteroids. *Proc Nat Acad Sci USA* **102**: 15253–15258

Rozhon W, Mayerhofer J, Petuschnig E, Fujioka S, Jonak C (2010) *Arabidopsis* GSK3, functions in the brassinosteroid signalling pathway. *Plant J* **62**: 215–223

Sekimata K, Kimura T, Kaneko I, Nakano T, Yoneyama K, Takeuchi Y, Yoshida S, Asami T (2001) A specific brassinosteroid biosynthesis inhibitor, Brz2001: evaluation of its effects on *Arabidopsis*, cress, tobacco, and rice. *Planta* **213**: 716–721

Weigel D, Ahn JH, Blazquez MA, Borevitz JO, Christensen SK, Fankhauser C, Ferrandiz C, Kardailsky I, Malancharuvil EJ, Neff MM, Nguyen JT, Sato S, Wang ZY, Xia Y, Dixon RA, Harrison MJ, Lamb CJ, Yanofsky MF, Chory J (2000) Activation tagging in *Arabidopsis*. *Plant Physiol* **122**: 1003–1013

Weigel D and Glazebrook J (2001) *Arabidopsis: A Laboratory Manual* (Cold Spring Harbor, NY: Cold Spring Harbor Laboratory Press)

## Supplementary figure legends

**Figure S1** Analysis of CES-YFP subcellular localization in *Arabidopsis* plants stably transformed with 35S<sub>pro</sub>:CES-YFP. CES-YFP localizes diffusely to the nucleus in 14-day-old seedlings of 35S<sub>pro</sub>:CES-YFP. Nuclear compartmentalization was induced by application of 1 μM 24-epiBL for 2 h to plants pre-treated with 2.5 μM Brz2001 for 24 h. Application of Brz2001 on its own did not induce nuclear body formation.

**Figure S2** Analysis of BEE1-YFP and BEE3-YFP subcellular localization and interactions of CES with BEE1 and BEE3 in yeast two-hybrid assays. **(A)** 35S<sub>pro</sub>:BEE1-YFP reporter expression in *Arabidopsis* protoplasts treated with 24-epiBL (1 μM) 2 hr as compared to untreated controls. **(B)** 35S<sub>pro</sub>:BEE3-YFP reporter expression in *Arabidopsis* protoplasts treated with 24-epiBL (1 μM) for 2 hr as compared to untreated controls. **(C)** Images of a representative 35S<sub>pro</sub>:CES-CFP and 35S<sub>pro</sub>:BEE3-YFP co-expressing protoplast after 2 hr of 24-epiBL treatment. **(D)** Quantitative yeast two-hybrid analysis of β-galactosidase activity in cells transformed with combinations of CES and BEE1, BEE3 resp. as compared to control strains. Data points represent the average of three replicates. The standard deviation is shown.

Poppenberger *et al.* Supp Fig 1

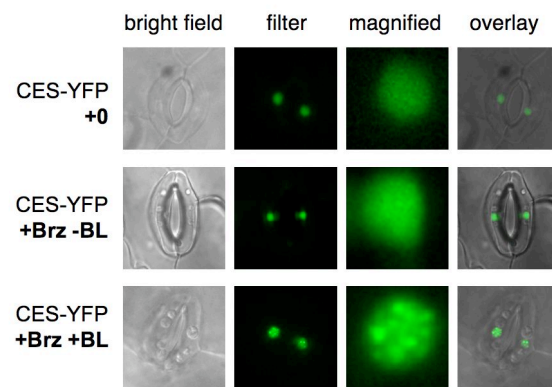

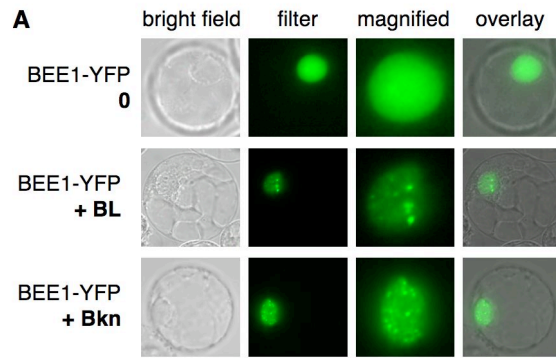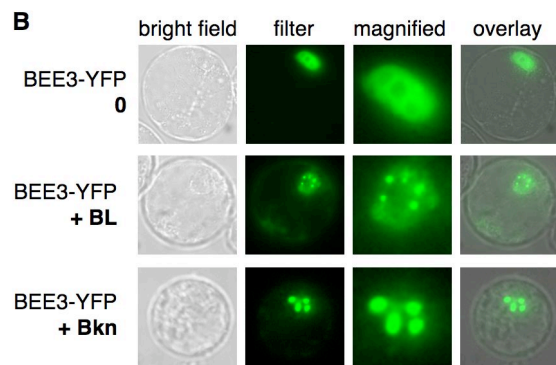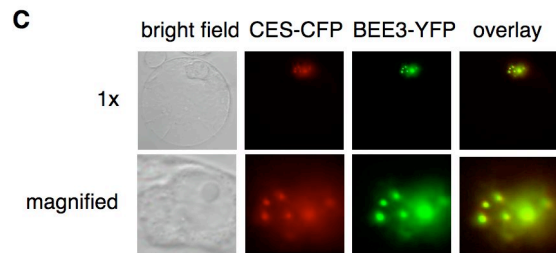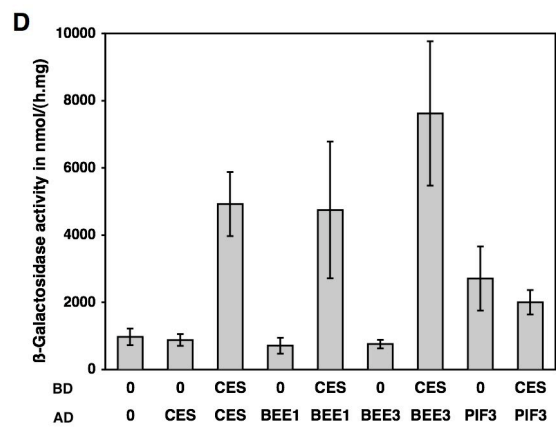

### Supplementary Table 3

BR-induced genes significantly up-regulated in *ces-D* and their expression in *35Sp:cMyc-CES-SRDX* plants.

| Public ID |       | <i>ces-D/Col-0</i>  |                       |                       | SRDX/Col-0          |                       |                       | Gene symbol | Description                                   |
|-----------|-------|---------------------|-----------------------|-----------------------|---------------------|-----------------------|-----------------------|-------------|-----------------------------------------------|
|           |       | Ratio <sup>a)</sup> | p-value <sup>b)</sup> | q-value <sup>c)</sup> | Ratio <sup>d)</sup> | p-value <sup>b)</sup> | q-value <sup>c)</sup> |             |                                               |
| At4g25810 | 1,3   | 4.92                | 0.0001                | 0.0046                | 2.42                | 0.0001                | 0.0129                | XTR6        | Xyloglucan-xyloglucosyl transferase           |
| At4g16563 | 3     | 4.83                | 0.0000                | 0.0029                | 2.34                | 0.0000                | 0.0095                | ---         | ---                                           |
| At1g35140 | 3     | 4.71                | 0.0016                | 0.0172                | 1.84                | 0.0137                | 0.0718                | PHI-1       | Phosphate-induced 1                           |
| At3g45970 | 3     | 4.68                | 0.0002                | 0.0073                | 1.16                | 0.3219                | 0.3537                | AtEXLA1     | Expansin-like                                 |
| At1g62440 | 1     | 4.53                | 0.0185                | 0.0579                | 1.13                | 0.8141                | 0.5569                | LRX2        | Extensin; structural constituent of cell wall |
| At3g60140 | 2,3   | 3.99                | 0.0004                | 0.0097                | 0.22                | 0.0072                | 0.0522                | DIN2        | Dark-induced 2                                |
| At5g24030 | 3     | 3.75                | 0.0000                | 0.0040                | 1.55                | 0.0023                | 0.0324                | SLAH3       | SLAC1 homologue 3                             |
| At1g10550 | 1,3   | 3.66                | 0.0000                | 0.0026                | 1.82                | 0.0000                | 0.0083                | XTH33       | Xyloglucan-xyloglucosyl transferase           |
| At2g35290 | 3     | 3.59                | 0.0006                | 0.0107                | 0.94                | 0.6106                | 0.4858                | ---         | ---                                           |
| At2g19800 | 1,2,3 | 3.36                | 0.0003                | 0.0079                | 3.30                | 0.0020                | 0.0308                | MIOX2       | Myo-inositol oxygenase 2                      |
| At4g38400 | 1,2,3 | 3.25                | 0.0001                | 0.0060                | 1.17                | 0.3685                | 0.3790                | AtEXLA2     | Expansin-like                                 |
| At5g57550 | 2     | 3.21                | 0.0173                | 0.0557                | 2.84                | 0.0025                | 0.0335                | XTR3        | Xyloglucan-xyloglucosyl transferase           |
| At3g59350 | 3     | 3.12                | 0.0001                | 0.0048                | 1.36                | 0.0441                | 0.1269                | ---         | ---                                           |
| At1g77640 | 3     | 3.12                | 0.0008                | 0.0126                | 0.86                | 0.3818                | 0.3859                | ---         | ---                                           |
| At2g27920 | 2,3   | 3.07                | 0.0001                | 0.0056                | 0.73                | 0.0635                | 0.1530                | SCPL51      | Serine carboxypeptidase                       |
| At5g44680 | 3     | 2.97                | 0.0002                | 0.0064                | 0.80                | 0.0028                | 0.0353                | ---         | ---                                           |
| At2g34510 | 1,2,3 | 2.95                | 0.0054                | 0.0307                | 1.46                | 0.0292                | 0.1029                | ---         | Anchored to membrane                          |
| At4g08950 | 1,2,3 | 2.90                | 0.0019                | 0.0187                | 2.54                | 0.0003                | 0.0153                | ---         | ---                                           |
| At2g47440 | 1,2,3 | 2.81                | 0.0003                | 0.0082                | 0.89                | 0.3103                | 0.3471                | ---         | Heat shock protein folding                    |
| At2g42580 | 3     | 2.75                | 0.0001                | 0.0048                | 1.41                | 0.0106                | 0.0630                | TTL3        | Leaf vascular tissue pattern formation        |
| At5g54380 | 3     | 2.71                | 0.0009                | 0.0131                | 1.18                | 0.2025                | 0.2784                | THE1        | Regulation of cell growth                     |
| At3g06070 | 3     | 2.56                | 0.0006                | 0.0108                | 0.46                | 0.0000                | 0.0074                | ---         | ---                                           |
| At5g41080 | 3     | 2.54                | 0.0012                | 0.0151                | 1.96                | 0.0156                | 0.0757                | ---         | ---                                           |
| At5g13220 | 3     | 2.50                | 0.0017                | 0.0179                | 1.83                | 0.0169                | 0.0786                | JAS1        | Jasmonate-associated 1                        |
| At1g23030 | 1,3   | 2.47                | 0.0006                | 0.0110                | 1.04                | 0.6621                | 0.5061                | ---         | Ubiquitin-protein ligase activity             |
| At5g57560 | 1,3,4 | 2.41                | 0.0013                | 0.0158                | 0.71                | 0.1628                | 0.2469                | TCH4        | Xyloglucan-xyloglucosyl transferase           |
| At5g06720 | 1,2,3 | 2.41                | 0.0008                | 0.0123                | 1.59                | 0.0016                | 0.0272                | ---         | Hydrogen peroxide catabolic process           |
| At2g16060 | 4     | 2.38                | 0.0008                | 0.0123                | 1.64                | 0.0030                | 0.0361                | AHB1        | Oxygen transporter activity                   |
| At3g47340 | 4     | 2.36                | 0.0005                | 0.0106                | 1.68                | 0.0524                | 0.1384                | ASN1        | Dark-induced; amino acid biosynthesis         |
| At2g33570 | 3     | 2.35                | 0.0006                | 0.0110                | 1.11                | 0.1984                | 0.2753                | ---         | ---                                           |
| At3g62720 | 3     | 2.33                | 0.0017                | 0.0176                | 1.28                | 0.0133                | 0.0705                | ATXT1       | Xylosyltransferase 1                          |
| At1g11260 | 2,3   | 2.31                | 0.0001                | 0.0048                | 1.32                | 0.0137                | 0.0717                | STP1        | Sugar transporter 1                           |
| At4g35320 | 2,3   | 2.28                | 0.0001                | 0.0059                | 0.75                | 0.0622                | 0.1521                | ---         | ---                                           |
| At2g14900 | 2,3   | 2.27                | 0.0019                | 0.0188                | 1.09                | 0.2872                | 0.3336                | ---         | Endomembrane system                           |
| At3g54030 | 3     | 2.25                | 0.0429                | 0.0950                | 3.15                | 0.0174                | 0.0796                | ---         | ---                                           |
| At1g66160 | 3     | 2.25                | 0.0028                | 0.0222                | 1.20                | 0.0463                | 0.1301                | ---         | ---                                           |
| At4g39830 | 2,3   | 2.25                | 0.0019                | 0.0186                | 0.88                | 0.0319                | 0.1075                | ---         | L-ascorbate oxidase activity                  |
| At2g32150 | 2,3   | 2.21                | 0.0007                | 0.0117                | 0.88                | 0.0674                | 0.1568                | ---         | Hydrolase activity                            |
| At3g50560 | 3     | 2.20                | 0.0005                | 0.0104                | 0.88                | 0.5540                | 0.4643                | ---         | ---                                           |
| At1g44350 | 3     | 2.19                | 0.0069                | 0.0348                | 1.44                | 0.0221                | 0.0895                | ILL6        | IAA-leucine resistant (ILR)-like gene 6       |
| At5g39580 | 3     | 2.17                | 0.0011                | 0.0145                | 2.66                | 0.0048                | 0.0438                | ---         | Hydrogen peroxide catabolic process           |
| At5g06870 | 3     | 2.16                | 0.0001                | 0.0059                | 1.01                | 0.8902                | 0.5800                | PGIP2       | Polygalacturonase inhibiting protein 2        |
| At3g05900 | 3     | 2.16                | 0.0012                | 0.0148                | 1.26                | 0.0007                | 0.0192                | ---         | ---                                           |
| At3g58620 | 3     | 2.16                | 0.0033                | 0.0244                | 1.10                | 0.7000                | 0.5189                | TTL4        | Tetratricopeptide-repeat thioredoxin-like 4   |
| At2g28400 | 2,3   | 2.16                | 0.0003                | 0.0085                | 0.94                | 0.2643                | 0.3188                | ---         | ---                                           |
| At4g31800 | 3     | 2.13                | 0.0006                | 0.0107                | 3.63                | 0.0001                | 0.0101                | WRKY18      | WRKY DNA-binding protein 18                   |
| At4g25260 | 2,3   | 2.11                | 0.0014                | 0.0162                | 1.02                | 0.7987                | 0.5518                | ---         | Pectinesterase activity, shade avoidance      |
| At3g06770 | 3     | 2.10                | 0.0002                | 0.0073                | 0.79                | 0.0146                | 0.0739                | ---         | ---                                           |
| At3g30775 | 4     | 2.10                | 0.0002                | 0.0066                | 2.70                | 0.0036                | 0.0385                | ERD5        | Early responsive to dehydration 5             |
| At2g34300 | 3     | 2.09                | 0.0056                | 0.0315                | 1.25                | 0.1425                | 0.2304                | ---         | ---                                           |
| At5g58670 | 2,3   | 2.09                | 0.0067                | 0.0341                | 0.74                | 0.0096                | 0.0603                | ATPLC1      | Phospholipase C, lipid metabolic process      |
| At4g31000 | 3     | 2.06                | 0.0035                | 0.0251                | 1.94                | 0.0417                | 0.1235                | ---         | Calmodulin binding                            |
| At5g03120 | 3     | 2.03                | 0.0001                | 0.0047                | 1.00                | 0.9322                | 0.5920                | ---         | ---                                           |
| At2g34930 | 1,2,3 | 2.02                | 0.0290                | 0.0757                | 3.63                | 0.0002                | 0.0134                | ---         | Defence response                              |
| At5g01040 | 3     | 2.01                | 0.0016                | 0.0171                | 1.26                | 0.0773                | 0.1680                | LAC8        | Laccase 8                                     |
| At1g76090 | 3     | 2.01                | 0.0001                | 0.0048                | 1.16                | 0.0832                | 0.1746                | SMT3        | Sterol methyltransferase 3                    |
| At1g03870 | 1,2,3 | 2.01                | 0.0017                | 0.0179                | 1.34                | 0.0700                | 0.1601                | FLA9        | Fasciclin-like arabinogalactan-protein 9      |

<sup>a)</sup> Ratio of the microarray intensity of the *ces-D* mutant and Col-0 controls.

<sup>b)</sup> Student's t-Test p-value.

<sup>c)</sup> FDR q-value.

<sup>d)</sup> Ratio of the microarray intensity of the dominant-negative over-expressor line CES-SRDX #203 and Col-0 controls.

References: 1, Goda *et al.* 2002; 2, Goda *et al.* 2004; 3, He *et al.*, 2005; 4, Müssig *et al.*, 2002

### Supplementary Table 4

Genes involved in the regulation of transcription (GO 0006355) significantly up-regulated in *cesD*.

| Public ID | <i>cesD</i> /Col-0  |                       |                       | CES-SRDX/Col-0      |                       |                       | Gene symbol | Description                                             |
|-----------|---------------------|-----------------------|-----------------------|---------------------|-----------------------|-----------------------|-------------|---------------------------------------------------------|
|           | Ratio <sup>a)</sup> | p-value <sup>b)</sup> | q-value <sup>c)</sup> | Ratio <sup>d)</sup> | p-value <sup>b)</sup> | q-value <sup>c)</sup> |             |                                                         |
| At1g65330 | 26.51               | 0.0000                | 0.0028                | 0.91                | 0.9087                | 0.5854                | PHE2        | Agamous-like transcription factor                       |
| At1g18710 | 18.91               | 0.0087                | 0.0390                | 1.15                | 0.8588                | 0.5721                | AtMYB47     | Myb-type transcription factor, responsive to JA         |
| At2g44910 | 14.61               | 0.0091                | 0.0400                | 1.67                | 0.2417                | 0.3046                | ---         | Transcription factor activity, shade avoidance          |
| At3g15170 | 13.57               | 0.0198                | 0.0603                | 0.69                | 0.6267                | 0.4925                | CUC1        | Shoot apical meristem formation                         |
| At2g28700 | 9.95                | 0.0157                | 0.0529                | 2.15                | 0.4733                | 0.4284                | AGL46       | Agamous-like, transcription factor activity             |
| At5g53980 | 6.85                | 0.0028                | 0.0223                | 0.69                | 0.4032                | 0.3963                | ATHB52      | Homeodomain leucine zipper class I                      |
| At2g34600 | 5.58                | 0.0031                | 0.0236                | 2.43                | 0.0458                | 0.1294                | JAZ7        | Response to JA and chitin                               |
| At3g54340 | 5.00                | 0.0144                | 0.0504                | 9.35                | 0.0015                | 0.0261                | AP3         | Floral homeotic gene                                    |
| At1g22130 | 3.28                | 0.0345                | 0.0835                | 1.09                | 0.9219                | 0.5891                | AGL104      | Agamous-like; pollen development, tube growth           |
| At1g77640 | 3.12                | 0.0008                | 0.0126                | 0.86                | 0.3818                | 0.3859                | ---         | Contains a AP2 domain                                   |
| At1g01250 | 2.77                | 0.0265                | 0.0719                | 3.90                | 0.0008                | 0.0209                | ---         | Putative transcription factor of unknown function       |
| At4g28190 | 2.75                | 0.0009                | 0.0129                | 1.11                | 0.3676                | 0.3784                | ULT1        | Regulation of inflorescence meristem growth             |
| At5g50570 | 2.75                | 0.0000                | 0.0040                | 0.91                | 0.3766                | 0.3832                | ---         | Putative SBP-box binding transcription factor           |
| At1g44830 | 2.70                | 0.0001                | 0.0061                | 1.74                | 0.0671                | 0.1564                | ---         | ERF/AP2 transcription factor family                     |
| At3g58120 | 2.62                | 0.0004                | 0.0088                | 0.91                | 0.3981                | 0.3939                | ---         | BZIP family transcription factors                       |
| At5g13220 | 2.50                | 0.0017                | 0.0179                | 1.83                | 0.0169                | 0.0786                | JAS1        | Overexpression enhances insensitivity to MeJa           |
| At4g37850 | 2.50                | 0.0039                | 0.0265                | 1.54                | 0.3549                | 0.3718                | ---         | Basic helix-loop-helix (bHLH) family protein            |
| At1g21910 | 2.45                | 0.0016                | 0.0173                | 1.25                | 0.0819                | 0.1733                | ---         | ERF/AP2 transcription factor                            |
| At3g16770 | 2.34                | 0.0001                | 0.0059                | 1.04                | 0.5265                | 0.4523                | ATEBP       | Suppressor of Bax-induced cell death                    |
| At4g36730 | 2.28                | 0.0004                | 0.0091                | 1.29                | 0.0670                | 0.1563                | GBF1        | bZIP transcription factor, G-box binding                |
| At2g30590 | 2.25                | 0.0004                | 0.0088                | 1.48                | 0.0131                | 0.0702                | WRKY21      | WRKY DNA-binding protein, unknown function              |
| At2g14210 | 2.20                | 0.0042                | 0.0272                | 0.90                | 0.8608                | 0.5726                | ANR1        | Agamous-like, response to nutrient                      |
| At2g42380 | 2.15                | 0.0255                | 0.0702                | 0.13                | 0.0000                | 0.0072                | ---         | Heterodimerizes with AtbZIP61, binds G-boxes            |
| At5g60850 | 2.14                | 0.0028                | 0.0225                | 0.52                | 0.0001                | 0.0116                | OBP4        | Zinc finger protein,                                    |
| At4g31800 | 2.13                | 0.0006                | 0.0107                | 3.63                | 0.0001                | 0.0101                | WRKY18      | Pathogen-induced transcription factor                   |
| At5g10140 | 2.08                | 0.0006                | 0.0107                | 2.25                | 0.0000                | 0.0082                | FLC         | Agamous-like; negative regulation of flower development |

<sup>a)</sup> Ratio of the microarray intensity of the *cesD* mutant and Col-0 controls.

<sup>b)</sup> t-Test p-value.

<sup>c)</sup> FDR q-value.

<sup>d)</sup> Ratio of the microarray intensity of the dominant-negative over-expressor line CES-SRDX #203 and Col-0 controls.



**Supplementary Table 5**

Sequences of primers used in this study.

| Name                                       |    | Sequence                           |    |
|--------------------------------------------|----|------------------------------------|----|
| Primers used for cloning and sequencing    |    |                                    |    |
| CESpGBKT7-fw                               | 5' | AAGCATATGATGGCACGGTTTGGAG CCATA    | 3' |
| CESpGBKT7-rv                               | 5' | TGCGGATCCTCAAAGGGTAATGTTGAACTG     | 3' |
| CESp2RT-fw                                 | 5' | GTACTIONGAGCTAATGGCACGGTTTGGAGCC   | 3' |
| CESp2RT-rv                                 | 5' | TGCGGATCCTCAAAGGGTAATGTTGAACTG     | 3' |
| BEE1pGBKT7-fw                              | 5' | TCTCAATTGAATTCATTATGGCAAATTCGAGA   | 3' |
| BEE1pGBKT7-rv                              | 5' | GAGGATCCAAAAGTCAAAGGGACCATG        | 3' |
| BEE3pGBKT7-fw                              | 5' | CACATATGGCGAATCTCTCTTCTGA          | 3' |
| BEE3pGBKT7-rv                              | 5' | CAAGGATCCAAAAGTCAAAGGGTC           | 3' |
| CESfusions-fw-c                            | 5' | CTATCAAGCTTGCCGATGGTGTATA          | 3' |
| CEStranscGUS-rv-a                          | 5' | CTCGGATCCTGCCATTAGAGACTA           | 3' |
| pGWR8-BEE1-1                               | 5' | GATATCACCATGGCAAATTCGAGAATCT       | 3' |
| pGWR8-BEE1-2                               | 5' | GCGGCCGCTAAGGGACCATGTTGATAAAT      | 3' |
| pGWR8-BEE3-1                               | 5' | ACCATGGCGAATCTCTCTTCTGA            | 3' |
| pGWR8-BEE3-2                               | 5' | GCGGCCGCTAAGGGTCCACGATGATGAATG     | 3' |
| pGWR8-CES-1                                | 5' | ACCATGGCACGGTTTGGAGCCATA           | 3' |
| PGWR8-CES-2                                | 5' | GCGGCCGCTAAGGGTAATGTTGAACTGAAATTAG | 3' |
| SOER2                                      | 5' | GCAGGCATGCAAGCTTATCGATATCTAGA      | 3' |
| SOEL2                                      | 5' | TGATGTGATATCTAGATCCGAACTATCA       | 3' |
| Primers used for RT-semiquantitative PCR   |    |                                    |    |
| At1g25320RT-fw                             | 5' | GTATACTCATTGGAGTGATCTTGCTA         | 3' |
| At1g25320RT-rv                             | 5' | GATATGCTTCATCGGTGGACG              | 3' |
| At1g25340RT-fw                             | 5' | GATTGTTCCACTTCCATGTCAGAA           | 3' |
| At1g25340RT-rv                             | 5' | TGTCATCCATGTTCCACATTAGATC          | 3' |
| CESRT-fw                                   | 5' | CTCAGAAGCCAAAAGATGT                | 3' |
| CESRT-rv                                   | 5' | TCAAAGGGTAATGTTGAA                 | 3' |
| CPDRT-fw                                   | 5' | GGTGGAAAGTATTCTCATCGTT             | 3' |
| CPDRT-rv                                   | 5' | ATCACGGCGCTT CACG                  | 3' |
| DWF4RT-fw                                  | 5' | GTCATCCTCAGGAAGTGGTAGT             | 3' |
| DWF4RT-rv                                  | 5' | TACAGAATACGAGAAACCCTAATAG          | 3' |
| ROT3-fw                                    | 5' | TATTAACGGGGTGTGGAGGA               | 3' |
| ROT3-rv                                    | 5' | CAAGTGAGATCGGAGAAGCA               | 3' |
| UBQ5-fw                                    | 5' | GTCCTTCTTTCTGGTAAACGT              | 3' |
| UBQ5-rv                                    | 5' | AACCCTTGAGTTGAATCATC               | 3' |
| Primers used for RT-qPCR                   |    |                                    |    |
| CPD-1                                      | 5' | CTTGCTCAACTCAAGGAAGAG              | 3' |
| CPD-2                                      | 5' | CTCGTAGCGTCTCATTAAACCAC            | 3' |
| DWF4-3                                     | 5' | CCGTTGAAGAGCTTAGGGAAGAG            | 3' |
| DWF4-4                                     | 5' | CATTTCCAATCGAAGAGTTTC              | 3' |
| ROT3-3                                     | 5' | CTTGTAACCCGGTACAGTTGC              | 3' |
| ROT3-4                                     | 5' | TCCGCTTCATCTTCACAGTC               | 3' |
| UBQ5-1                                     | 5' | ACCAAGCCGAAGAAGATCAA               | 3' |
| UBQ5-2                                     | 5' | ATGACTCGCCATGAAAGTCC               | 3' |
| Primers used for ChIP-semiquantitative PCR |    |                                    |    |
| CPD-ChIP-1                                 | 5' | TTATCGAGCTACATATCAGCAATTC          | 3' |
| CPD-ChIP-2                                 | 5' | TTACTTAACACTTCCCAAAGTCTG           | 3' |
| CPD-ChIP-3                                 | 5' | CAGACTTTGGGAAGTGTTAAGTA            | 3' |
| CPD-ChIP-4                                 | 5' | GAAGAAGAAGATACTCCTAGTAGGAG         | 3' |
| CPD-ChIP-5                                 | 5' | CGTGATATATAAATATCAATCATCTACG       | 3' |
| CPD-ChIP-6                                 | 5' | GGAAACGAAAGAGATTGAGTTT             | 3' |
| CPD-ChIP-7                                 | 5' | CAATAGGAGACAAATAAGAGGTAGA          | 3' |
| CPD-ChIP-8                                 | 5' | GGACACCAAACGTTAAAACCTAA            | 3' |
| CPD-ChIP-9                                 | 5' | AATACTCAAACAGTATATGGAAGAACCG       | 3' |
| CPD-ChIP-10                                | 5' | GGCTGTGAGTATTTGTAGGTTACAAA         | 3' |
| CPD-ChIP-13                                | 5' | ATCCCAAGATTAGTATATATCTGCC          | 3' |
| CPD-ChIP-14                                | 5' | CGTCTATGCGTACCTAAAGATC             | 3' |
| CPD-ChIP-15                                | 5' | CTCTTACCCACTAACACAAGAGTATAGTATATTC | 3' |
| CPD-ChIP-16                                | 5' | CCAAGTGGCATACAAAGATGAAACAATT       | 3' |
| Primers used for ChIP-qPCR                 |    |                                    |    |
| 5S-F <sup>a)</sup>                         | 5' | GGATGCGATCATACCAGCACT              | 3' |
| 5S-R <sup>a)</sup>                         | 5' | GAGGGATGCAACACGAGGACT              | 3' |
| CPD-qPCR-9                                 | 5' | ATCTGGGGATTTACGTGTC                | 3' |
| CPD-qPCR-10                                | 5' | GCTAAATCACATATCATAAAGCAAGC         | 3' |
| COR15a-ChIP-1                              | 5' | ACAATTTTCATGGCCGACCT               | 3' |
| COR15a-ChIP-2                              | 5' | TTTCAGGCCACGTGTAATCA               | 3' |

**Supplementary Table 5**

(continued)

| Name            |    | Sequence                   |    |
|-----------------|----|----------------------------|----|
| COR15a-ChIP-3   | 5' | TGTTGGCCGACATACATTG        | 3' |
| COR15a-ChIP-4   | 5' | TCGTTCTCATTTCCTTCACG       | 3' |
| COR15b-ChIP-1   | 5' | GATAATAGCAATGCGCAAAAA      | 3' |
| COR15b-ChIP-2   | 5' | TCTCGACCAATGAGAATCCA       | 3' |
| CYP718-ChIP-3   | 5' | ACATACAGCGAGGCCACTTG       | 3' |
| CYP718-ChIP-4   | 5' | TTGATGGGTCTCTTCTACCTC      | 3' |
| CYP724a1-ChIP-1 | 5' | CATGAGGGTCCCAAATTACG       | 3' |
| CYP724a1-ChIP-2 | 5' | TTTCTCAAAAAGAGGAATGTAAGAAA | 3' |
| DIN11-ChIP-1    | 5' | TCAAGGGATTTGGATCACTCAC     | 3' |
| DIN11-ChIP-2    | 5' | TCATCACGTGTAAGTTAGTTGGAG   | 3' |
| DWF4-ChIP-1     | 5' | CTCGTCTCGTCATGTCACCTTC     | 3' |
| DWF4-ChIP-2     | 5' | CAATGATTGCCGGAATGG         | 3' |
| JR2-ChIP-1      | 5' | ACAAGATTTAAGATCACCGAAGG    | 3' |
| JR2-ChIP-2      | 5' | GCCAATGGTTTTTCACATTGTTC    | 3' |
| KIN1-ChIP-1     | 5' | CCGACATAAGGCAAAACTCGA      | 3' |
| KIN1-ChIP-2     | 5' | GAGTGTGGTGCCACGAGTAA       | 3' |
| PHE2-ChIP-1     | 5' | GAATTTGCGGTGGATGAGTT       | 3' |
| PHE2-ChIP-2     | 5' | TTTGGGAAACAATTTCAAGTTC     | 3' |

<sup>a)</sup> Reference: Le *et al.* (2010)
